# Supplementary material for: Genome-wide identification of the heat shock transcription factor gene family in two kiwifruit species
Source: Front Plant Sci. 2023 Sep 20;14:1075013. doi: 10.3389/fpls.2023.1075013 (PMC10548268; doi:10.3389/fpls.2023.1075013)
Supplement: Supplementary file 7 [file Table_1.xlsx]

## Sheet: Table 1
Table S1. Protein composition and physiochemical characteristics of kiwifruit Hsfs.
Species	Name	Gene_id	CDS length	Peptide residue	MW (kD)	pI	GRAVY	Subcellular location
Ac	AcHsfA1a	Acc16075.1	1437	479	53704.4	5.2287	-0.618163	Nuclear
	AcHsfA1b	Acc20407.1	870	290	32502.1	6.3403	-0.760345	Nuclear
	AcHsfA1c	Acc20419.1	1509	503	55972.2	4.9989	-0.535586	Nuclear
	AcHsfA1d	Acc28172.1	849	283	31275.1	8.80904	-0.554417	Nuclear
	AcHsfA2a	Acc22614.1	828	276	31060.8	5.32885	-0.503986	Nuclear
	AcHsfA2b	Acc28668.1	1059	353	40323.1	5.68904	-0.756657	Nuclear
	AcHsfA3a	Acc02109.1	717	239	27835	5.24382	-0.819247	Nuclear
	AcHsfA4a	Acc06517.1	177	59	6772.54	4.5551	-0.255932	Nuclear
	AcHsfA4b	Acc13935.1	846	282	32163.1	6.27022	-0.628014	Nuclear
	AcHsfA4c	Acc18886.1	783	261	30049.9	7.09899	-0.592337	Nuclear
	AcHsfA4d	Acc21364.1	1182	394	45138.2	4.92762	-0.739086	Nuclear
	AcHsfA5a	Acc01927.1	990	330	38174	5.69853	-0.622727	Nuclear
	AcHsfA5b	Acc03093.1	954	318	35100.5	4.86419	-0.740881	Nuclear
	AcHsfA6a	Acc04237.1	903	301	33379	5.3147	-0.495017	Nuclear
	AcHsfA6b	Acc27358.1	1020	340	39265.8	4.86504	-0.654706	Nuclear
	AcHsfA7a	Acc25577.1	936	312	35351.6	6.70015	-0.491987	Nuclear
	AcHsfA7b	Acc31729.1	1626	542	60737	9.02501	-0.607749	Nuclear
	AcHsfA8a	Acc28370.1	1557	519	58376.9	6.26891	-0.369942	Nuclear
	AcHsfA8b	Acc31134.1	819	273	30221.3	6.03831	-0.779121	Nuclear
	AcHsfA9a	Acc12994.1	1536	512	56190.1	4.92592	-0.558789	Nuclear
	AcHsfA9b	Acc23343.1	1401	467	52808.3	5.3679	-0.883298	Nuclear
	AcHsfB1a	Acc06038.1	1008	336	38474.3	4.86447	-0.578274	Nuclear
	AcHsfB1b	Acc10326.1	1059	353	39636.8	5.20056	-0.661756	Nuclear
	AcHsfB1c	Acc31008.1	1179	393	45040.2	5.67545	-0.763613	Nuclear
	AcHsfB2a	Acc03481.1	690	230	25914.7	8.72001	-0.735217	Nuclear
	AcHsfB2b	Acc19984.1	921	307	34739.9	6.72913	-0.514332	Nuclear
	AcHsfB2c	Acc28038.1	1101	367	41842.2	5.03249	-0.711444	Nuclear
	AcHsfB3a	Acc23145.1	723	241	27528.6	5.16441	-0.818257	Nuclear
	AcHsfB3b	Acc23154.1	561	187	21116.5	7.75849	-0.568449	Nuclear
	AcHsfB4a	Acc00304.1	1188	396	45173.1	4.95468	-0.751768	Nuclear
	AcHsfB4b	Acc04732.1	798	266	30879	8.35854	-0.588346	Nuclear
	AcHsfB4c	Acc11785.1	1368	456	51323.7	6.40566	-0.548684	Nuclear
	AcHsfB4d	Acc12042.1	894	298	33422.7	5.20125	-0.878523	Nuclear
	AcHsfB5a	Acc17335.1	2190	730	83845.6	8.79976	-0.621781	Nuclear
	AcHsfC1a	Acc13091.1	801	267	29709.7	5.99847	-0.761049	Nuclear
	AcHsfC1b	Acc23234.1	936	312	36435.4	5.43633	-0.750641	Nuclear
Ae	AeHsfA1a	DTZ79_14g07720	1275	425	48791.8	5.24967	-0.733882	Nuclear
	AeHsfA1b	DTZ79_18g08160	1530	510	57104.5	5.0833	-0.528431	Nuclear
	AeHsfA1c	DTZ79_24g12140	1536	512	56220.1	4.95633	-0.583594	Nuclear
	AeHsfA2a	DTZ79_20g03210	1020	340	39267.8	4.7857	-0.628824	Nuclear
	AeHsfA2b	DTZ79_25g04820	816	272	30115.2	6.98565	-0.798897	Nuclear
	AeHsfA3a	DTZ79_02g08920	879	293	34384.7	7.05488	-0.69727	Nuclear
	AeHsfA3b	DTZ79_02g08960	1401	467	52763.2	5.12394	-0.891435	Nuclear
	AeHsfA3c	DTZ79_22g06060	1188	396	45317.5	4.99316	-0.702778	Nuclear
	AeHsfA4a	DTZ79_06g06820	987	329	38058.9	5.78583	-0.62614	Nuclear
	AeHsfA4b	DTZ79_12g12240	1182	394	45246.5	4.92251	-0.736802	Nuclear
	AeHsfA4c	DTZ79_12g13240	846	282	32138.1	6.55992	-0.652837	Nuclear
	AeHsfA4d	DTZ79_17g00990	621	207	24203	8.69313	-0.963285	Nuclear
	AeHsfA4e	DTZ79_19g05240	1200	400	45758.6	4.84521	-0.66725	Nuclear
	AeHsfA5a	DTZ79_02g06560	1113	371	42168.9	4.65167	-0.495687	Nuclear
	AeHsfA5b	DTZ79_02g07500	1230	410	47169.8	4.90818	-0.563659	Nuclear
	AeHsfA5c	DTZ79_02g14180	1395	465	52607.1	5.37182	-0.876344	Nuclear
	AeHsfA5d	DTZ79_03g06230	987	329	37027.7	8.50836	-0.491793	Nuclear
	AeHsfA6a	DTZ79_03g18750	1533	511	56935.3	5.29116	-0.541683	Nuclear
	AeHsfA6b	DTZ79_24g03470	960	320	37077.3	5.24751	-0.71875	Nuclear
	AeHsfA6c	DTZ79_24g13410	1008	336	38480.3	4.97417	-0.579762	Nuclear
	AeHsfA7a	DTZ79_17g08930	1275	425	48562.4	5.30617	-0.740235	Nuclear
	AeHsfA7b	DTZ79_23g01840	1080	360	41695.6	5.64914	-0.8375	Nuclear
	AeHsfA8a	DTZ79_25g01580	1206	402	46057.3	4.64491	-0.554975	Nuclear
	AeHsfA8b	DTZ79_27g07960	1059	353	40584.3	5.70092	-0.809065	Nuclear
	AeHsfA9a	DTZ79_12g01030	831	277	31088.4	8.95848	-0.831047	Nuclear
	AeHsfA9b	DTZ79_20g13080	840	280	31795.7	5.55075	-0.549286	Nuclear
	AeHsfB1a	DTZ79_05g10500	945	315	34758.2	4.86391	-0.740952	Nuclear
	AeHsfB1b	DTZ79_09g05760	975	325	36788.2	7.20266	-0.524923	Nuclear
	AeHsfB1c	DTZ79_27g06080	1020	340	38719.7	4.82577	-0.474118	Nuclear
	AeHsfB2a	DTZ79_03g10230	1404	468	52791.2	5.21761	-0.858761	Nuclear
	AeHsfB2b	DTZ79_18g03510	903	301	33385.9	5.11786	-0.498339	Nuclear
	AeHsfB2c	DTZ79_24g11010	894	298	33232.5	5.27968	-0.855369	Nuclear
	AeHsfB3a	DTZ79_12g03600	921	307	34747.9	6.9208	-0.529967	Nuclear
	AeHsfB3b	DTZ79_20g10710	714	238	27528.7	5.23074	-0.771429	Nuclear
	AeHsfB4a	DTZ79_04g03520	1410	470	52898.3	5.10865	-0.887872	Nuclear
	AeHsfB4b	DTZ79_10g10590	867	289	32237.8	7.64669	-0.786851	Nuclear
	AeHsfB4c	DTZ79_11g01990	1200	400	45487	4.799	-0.64525	Nuclear
	AeHsfB4d	DTZ79_18g08770	1509	503	56007.3	5.03539	-0.526441	Nuclear
	AeHsfB5a	DTZ79_15g12130	1497	499	54977.7	4.98997	-0.594389	Nuclear
	AeHsfC1a	DTZ79_12g02240	936	312	35450.6	6.7006	-0.514103	Nuclear
	AeHsfC1b	DTZ79_20g11770	723	241	27604.7	5.15702	-0.846888	Nuclear
