# Supplementary material for: Genome-wide identification of the heat shock transcription factor gene family in two kiwifruit species
Source: Front Plant Sci. 2023 Sep 20;14:1075013. doi: 10.3389/fpls.2023.1075013 (PMC10548268; doi:10.3389/fpls.2023.1075013)
Supplement: Supplementary file 8 [file Table_2.xlsx]

## Sheet: Hsf_Ka
Table S2. Duplication events identified in kiwifruit Hsfs.
Gene pair		Duplicated type		Ka	Ks	Ka/Ks
Gene 1	Gene 2	Gene 1	Gene 2
AeHsfA5b	AeHsfA5d	WGD	WGD	0.165682	0.358362	0.462332
AeHsfA3a	AeHsfA3c	WGD	WGD	0.162365	0.289265	0.561302
AeHsfB2a	AeHsfB2c	WGD	WGD	0.0507783	0.265117	0.191531
AeHsfA6a	AeHsfA6b	WGD	WGD	0.0986483	0.278506	0.354205
AeHsfB1a	AeHsfB1c	WGD	WGD	0.0825374	0.224942	0.366928
AeHsfA4a	AeHsfA4e	WGD	WGD	0.099301	0.211122	0.470349
AeHsfB4b	AeHsfB4c	WGD	WGD	0.0586738	0.255778	0.229394
AeHsfA9a	AeHsfA9b	WGD	WGD	0.0625709	0.133737	0.467866
AeHsfC1a	AeHsfC1b	WGD	WGD	0.0562697	0.309998	0.181517
AeHsfB3a	AeHsfB3b	WGD	WGD	0.0459844	0.265569	0.173154
AeHsfA4b	AeHsfA4d	WGD	WGD	0.104742	0.298445	0.350959
AeHsfA1a	AeHsfA1c	WGD	WGD	0.294443	0.497964	0.591295
AeHsfA2a	AeHsfA2b	WGD	WGD	0.10452	0.160522	0.651124
AeHsfA8a	AeHsfA8b	WGD	WGD	0.0661386	0.262723	0.251742
AcHsfA5a	AcHsfA5b	WGD	WGD	0.0398033	0.133013	0.299245
AcHsfB4c	AcHsfB4d	WGD	WGD	0.0661707	0.212798	0.310955
AcHsfA9a	AcHsfA9b	WGD	WGD	0.0723452	0.152245	0.47519
AcHsfC1a	AcHsfC1b	WGD	WGD	0.0467433	0.22391	0.20876
AcHsfA4c	AcHsfA4d	WGD	WGD	0.0262852	0.147766	0.177885
AcHsfA1a	AcHsfA1d	WGD	WGD	0.038487	0.16651	0.23114
AcHsfA4d	AcHsfA4a	WGD	WGD	0.0671241	0.216651	0.309826
AcHsfA2a	AcHsfA2b	WGD	WGD	0.0772644	0.211727	0.364924
AcHsfA6b	AcHsfA6a	WGD	WGD	0.0614099	0.235766	0.26047
AcHsfB2c	AcHsfB2a	WGD	WGD	0.049296	0.307194	0.160472
AcHsfA8a	AcHsfA8b	WGD	WGD	0.0305775	0.161044	0.189871
