# Supplementary material for: Genome-wide identification of the heat shock transcription factor gene family in two kiwifruit species
Source: Front Plant Sci. 2023 Sep 20;14:1075013. doi: 10.3389/fpls.2023.1075013 (PMC10548268; doi:10.3389/fpls.2023.1075013)
Supplement: Supplementary file 9 [file Table_3.xlsx]

## Sheet: Sheet1
Table S3. List of plant Hsfs accession numbers.
AtHsfs	Arabidopsis (21)	OsHsfs	Rice (25)	VvHsfs	Grape (17)	JcHsfs	Physic nut (17)	SlyHsf	Tomato (27)
HsfA1a	At4g17750	OsHsfA1a	LOC_Os03g63750	VvHSF1	GSVIVP00001119001	JcHsf1	JCGZ_02229	SlyHsfA1a	Solyc08g005170
HsfA1b	At5g16820	OsHsfA2a	LOC_Os03g58160	VvHSF2	GSVIVP00007367001	JcHsf2	JCGZ_01081	SlyHsfA1b	Solyc03g097120
HsfA1d	At1g32330	OsHsfA2b	LOC_Os07g08140	VvHSF3	GSVIVP00013075001	JcHsf3	JCGZ_17108	SlyHsfA1c	Solyc08g076590
HsfA1e	At3g02990	OsHsfA2c	LOC_Os10g28340	VvHSF4	GSVIVP00013429001	JcHsf4	JCGZ_04789	SlyHsfA1e	Solyc06g072750
HsfA2a	At2g26150	OsHsfA2d	LOC_Os03g06630	VvHSF5	GSVIVP00014836001	JcHsf5	JCGZ_21617	SlyHsfA2	Solyc08g062960
HsfA3a	At5g03720	OsHsfA2e	LOC_Os03g53340	VvHSF6	GSVIVP00015710001	JcHsf6	JCGZ_21433	SlyHsfA3	Solyc09g009100
HsfA4a	At4g18880	OsHsfA3	LOC_Os02g32590	VvHSF7	GSVIVP00016537001	JcHsf7	JCGZ_26137	SlyHsfA4a	Solyc03g006000
HsfA4c	At5g45710	OsHsfA4b	LOC_Os01g54550	VvHSF8	GSVIVP00016746001	JcHsf8	JCGZ_21103	SlyHsfA4b	Solyc07g055710
HsfA5a	At4g13980	OsHsfA4d	LOC_Os05g45410	VvHSF9	GSVIVP00017248001	JcHsf9	JCGZ_06744	SlyHsfA4c	Solyc02g072000
HsfA6a	At5g43840	OsHsfA5	LOC_Os02g29340	VvHSF10	GSVIVP00018812001	JcHsf10	JCGZ_02539	SlyHsfA5	Solyc12g098520
HsfA6b	At3g22830	OsHsfA6a	LOC_Os06g36930	VvHSF11	GSVIVP00019488001	JcHsf11	JCGZ_12391	SlyHsfA6a	Solyc09g082670
HsfA7a	At3g51910	OsHsfA6b	LOC_Os01g39020	VvHSF12	GSVIVP00020055001	JcHsf12	JCGZ_21870	SlyHsfA6b	Solyc06g053960/50
HsfA7b	At3g63350	OsHsfA8	LOC_Os03g12370	VvHSF13	GSVIVP00021673001	JcHsf13	JCGZ_03936	SlyHsfA7	Solyc09g065660
HsfA8a	At1g67970	OsHsfB1	LOC_Os09g28354	VvHSF14	GSVIVP00023801001	JcHsf14	JCGZ_20639	SlyHsfA8	Solyc09g059520
HsfA9a	At5g54070	OsHsfB2a	LOC_Os04g48030	VvHSF15	GSVIVP00030611001	JcHsf15	JCGZ_07238	SlyHsfA9	Solyc07g040680
HsfB1a	At4g36990	OsHsfB2b	LOC_Os08g43334	VvHSF16	GSVIVP00032192001	JcHsf16	JCGZ_07430	SlyHsfB1	Solyc02g090820
HsfB2a	At5g62020	OsHsfB2c	LOC_Os09g35790	VvHSF17	GSVIVP00035821001	JcHsf17	JCGZ_07655	SlyHsfB2a	Solyc03g026020
HsfB2b	At4g11660	OsHsfB4a	LOC_Os08g36700					SlyHsfB2b	Solyc08g080540
HsfB3a	At2g41690	OsHsfB4b	LOC_Os07g44690					SlyHsfB3a	Solyc04g016000
HsfB4a	At1g46264	OsHsfB4c	LOC_Os09g28200					SlyHsfB3b	Solyc10g079380
HsfC1a	At3g24520	OsHsfB4d	LOC_Os03g25120					SlyHsfB4a	Solyc04g078770
		OsHsfC1a	LOC_Os01g43590					SlyHsfB4b	Solyc11g064990
		OsHsfC1b	LOC_Os01g53220					SlyHsfB5	Solyc02g078340
		OsHsfC2a	LOC_Os02g13800					SlyHsfC1	Solyc12g007070
		OsHsfC2b	LOC_Os06g35960					SlyHsfl1	Solyc02g072060
								SlyHsfl2	Solyc02g079180
								SlyHsfl3	Solyc11g008410
Note: Web pages for blast searches and gene identification are: http://plntfdb.bio.uni-potsdam.de/v3.0/ : Arabidopsis, Grape. https://www.ncbi.nlm.nih.gov/ : Physic nut. http://www.cibiv.at/services/hsf/: Rice, Tomato.
