# Supplementary material for: Genome-wide identification of the heat shock transcription factor gene family in two kiwifruit species
Source: Front Plant Sci. 2023 Sep 20;14:1075013. doi: 10.3389/fpls.2023.1075013 (PMC10548268; doi:10.3389/fpls.2023.1075013)
Supplement: Supplementary file 10 [file Table_4.xlsx]

## Sheet: Sheet1
Table S4. All the primer pairs were used in this study.
	Detail for primer pairs used in RT-qPCR analysis
Gene ID	Gene name	F-primer	R-primer
Acc08081	Ac-actin	GCAGGAATCCATGAGACTACC	GTCTGCTATACCAGGGAACAT
Acc03481	AcHsfB2a	CAACACCTACGGATTTCGAAAG	GCTACCATCAGGGGAACCG
Acc06038	AcHsfB1a	CTTAACACTTACGGCTTCCGG	GAATTCAATGGCGAAGAGGGAC
Acc22614	AcHsfA2a	GCTCAATACCTATGGTTTCAGAAAAG	CTTCTTCCACTCCGTACTGG
Acc23343	AcHsfA9b	GTTGAACACCTATGGTTTCAAGAAG	CTCATTATGGCTCTTTGTTGCAG
Acc31729	AcHsfA7b	CAGCTCAATACTTATGGTTTTAGGAAG	GACCTACTGCTTCTTGTGAAGAAAG
DTZ79_07g10460	Ae-actin	CAACTGGTTTGTATTGTACTGGATTCTGGTG	CTGTTAGATCACGGCCAGCAAG
DTZ79_03g10230	AeHsfB2a	CTCAACACCTACGGATTTCG	CTACCATCAGGGGAACCGC
DTZ79_17g08930	AeHsfA7a	GCTCAATACTTATGGTTTTAGGAAGATC	GGACCTACTGCTTCTTGTGAAG
DTZ79_20g03210	AeHsfA2a	CAATACCTATGGTTTCAGAAAAGTCG	CTTCTTCCACTCCATACTGGC
DTZ79_20g13080	AeHsfA9b	GTTGAACACCTATGGTTTCAAGAAG	CTCATTATGGCTCTTTGTTGCAG
DTZ79_23g01840	AeHsfA7b	CAACACTTATCCTGGCTCATCTTC	CATTGGCAAATTCCCATTTGTCTG
Note: The pair of primers for actin are highlighted in red colour
	Detail for primer pairs used for cloning genes
Gene ID	Gene name	F-primer	R-primer
Acc22614	AcHsfA2a	atggaaGGTGTGACAGTTAAGGAC	GCCAAACAAGTCATCAGGGTTC
Acc31729	AcHsfA7b	ATGAATCCTTCGAACCCAATTAAGG	CTTTGGGCTTGAACCCAAGTG
	Detail for primer pairs used for subcellular localization analysis
Gene ID	Gene name	F-primer	R-primer
Acc22614	AcHsfA2a	TTACAATTACGGATCatggaaGGTGTGACAGTTAAGGACG	tgctcaccatGGATCCGCCAAACAAGTCATCAGGGTTCG
Acc31729	AcHsfA7b	tgctcaccatGGATCCTTTGGGCTTGAACCCAAGTGAT	TTACAATTACGGATCCATGAATCCTTCGAACCCAATTAAGGAAG
	Detail for primer pairs used for Dual-luciferase reporter assay
Gene ID	Gene name	F-primer	R-primer
Acc22614	AcHsfA2a	ATCGATAAGCTTGATATGAGACAGAGGGATTGAGTGTTATTTAGT	CTGCAGGAATTCGATATCTCCATTTGAGAGAGAGAGAGAGAGGGG
