# Supplementary material for: Genome-wide identification of the heat shock transcription factor gene family in two kiwifruit species
Source: Front Plant Sci. 2023 Sep 20;14:1075013. doi: 10.3389/fpls.2023.1075013 (PMC10548268; doi:10.3389/fpls.2023.1075013)
Supplement: Supplementary file 11 [file Table_5.xlsx]

## Sheet: PRJNA691387
Table S5. Kiwifruit transcription 4 set of group data sample information.
PRJNA691387		PRJCA003268		PRJNA277383		PRJNA514344
BioSample accession	Sampple name	BioSample accession	Sampple name	BioSample accession	Sampple name	BioSample accession	Sampple name
SAMN17292041	Shoot	SAMC225985	40DAP-1	SAMN03389916	231DAFB (+1 Day after treatement)	SAMN10723641	Harvest_RT
SAMN17292040	Root	SAMC225986	40DAP-2	SAMN03389915	231DAFB (+4 Day after treatement)	SAMN10723639	16C
SAMN17292039	Leaf_source	SAMC225987	40DAP-3	SAMN03389914	231DAFB (+2 Day after treatement)	SAMN10723637	14C
SAMN17292038	Leaf_sink	SAMC225988	60DAP-1	SAMN03389912	fruit maturation series 224DAFB	SAMN10723635	12C
SAMN17292037	Fruit_T2	SAMC225989	60DAP-2	SAMN03389911	fruit maturation series 175DAFB	SAMN10723633	10C
SAMN17292036	Fruit_T1	SAMC225990	60DAP-3	SAMN03389910	fruit maturation series 168DAFB	SAMN10723631	8C
SAMN17292035	Flower_bud	SAMC225991	80DAP-1	SAMN03389909	fruit maturation series 147DAFB	SAMN10723629	3C
SAMN17292034	Flower	SAMC225992	80DAP-2	SAMN03389908	231DAFB (no treatment control)	SAMN10723627	0C
		SAMC225993	80DAP-3
		SAMC225994	100DAP-1
		SAMC225995	100DAP-2
		SAMC225996	100DAP-3
		SAMC225997	120DAP-1
		SAMC225998	120DAP-2
		SAMC225999	120DAP-3
		SAMC226000	140DAP-1
		SAMC226001	140DAP-2
		SAMC226002	140DAP-3
		SAMC226003	4DAH-1
		SAMC226004	4DAH-2
		SAMC226005	4DAH-3
		SAMC226006	6DAH-1
		SAMC226007	6DAH-2
		SAMC226008	6DAH-3
		SAMC226009	8DAH-1
		SAMC226010	8DAH-2
		SAMC226011	8DAH-3
		SAMC226012	10DAH-1
		SAMC226013	10DAH-2
		SAMC226014	10DAH-3
		SAMC226015	12DAH-1
		SAMC226016	12DAH-2
		SAMC226017	12DAH-3
		SAMC226018	14DAH-1
		SAMC226019	14DAH-2
		SAMC226020	14DAH-3
Note:Web pages for downloading transcriptome data include: https://www.ncbi.nlm.nih.gov/: PRJNA691387, PRJNA277383. https://ngdc.cncb.ac.cn/: PRJCA003268.
